# Supplementary material
Source: Springer Nature journal article supplement (https://www.springermedizin.de/resource/supplementary/12876_2008_313_MOESM2_ESM.pdf/9439144)
Supplement: MOESM2 [file 9439144]

|             | AUROC | 95% CI       | Cut-off                   |
|-------------|-------|--------------|---------------------------|
| <b>NH4</b>  | 0.78  | 0.71 to 0.85 | 42 mcM/L                  |
| <b>PLTs</b> | 0.67  | 0.59 to 0.74 | 131.5 X10 <sup>9</sup> /L |
| <b>SLD</b>  | 0.62  | 0.54 to 0.70 | 139 mm                    |

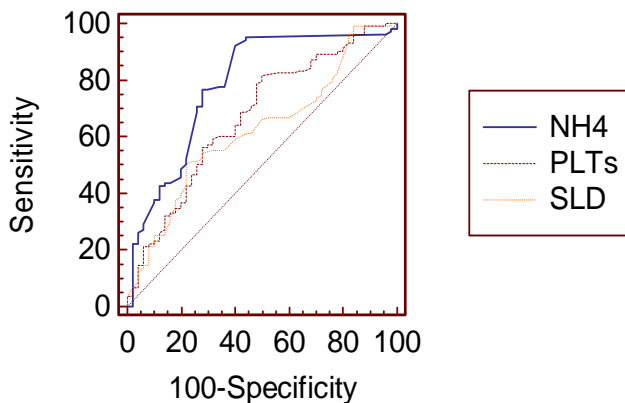

| Pairwise comparison of ROC curves |           |
|-----------------------------------|-----------|
| <b>NH4 ~ PLTs</b>                 |           |
| Difference between areas          | 0.11      |
| Significance level                | P = 0.05  |
| <b>NH4 ~ SLD</b>                  |           |
| Difference between areas          | 0.16      |
| Significance level                | P = 0.004 |
| <b>PLTs ~ SLD</b>                 |           |
| Difference between areas          | 0.48      |
| Significance level                | P = 0.33  |
